# Supplementary material for: Synthesis and Characterization of a Multi-Walled Carbon Nanotube–Ionic Liquid/Polyaniline Adsorbent for a Solvent-Free In-Needle Microextraction Method
Source: MDPI journal article supplement (doi:10.3390/molecules28083517), 2023-04-17
Supplement: s1 [file s1]

**Supplementary materials for**

**Synthesis and Characterization of a Multi-Walled Carbon Nanotube-Ionic Liquid/  
Polyaniline Adsorbent for a Solvent-Free In Needle Microextraction Method**

Soyoung Ahn, Sunyoung Bae\*

Department of Chemistry, Seoul Women's University, 621 Hwarang-ro, Nowon-gu, Seoul 01797,  
Republic of Korea

\*Corresponding Author

Email: sbae@swu.ac.kr

**Table S1.** Physical properties and chemical structures for each of the phthalates used in the target compounds in this study

| Compound<br>(Abbreviation)              | Chemical<br>formula                            | Molecular<br>weight<br>(g/mol) | Density<br>(g/mL) | Purity<br>(%) | Chemical<br>structure                                                                 |
|-----------------------------------------|------------------------------------------------|--------------------------------|-------------------|---------------|---------------------------------------------------------------------------------------|
| Dimethyl phthalate<br>(DMP)             | C <sub>10</sub> H <sub>10</sub> O <sub>4</sub> | 194.19                         | 1.19              | 99.0          | 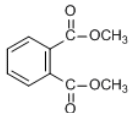   |
| Diethyl phthalate<br>(DEP)              | C <sub>12</sub> H <sub>14</sub> O <sub>4</sub> | 222.24                         | 1.12              | 98.0          |    |
| Diallyl phthalate<br>(DAP)              | C <sub>14</sub> H <sub>14</sub> O <sub>4</sub> | 246.26                         | 1.12              | 98.0          |    |
| Dibutyl phthalate<br>(DBP)              | C <sub>16</sub> H <sub>22</sub> O <sub>4</sub> | 278.35                         | 1.05              | 97.0          |    |
| Benzyl butyl<br>phthalate<br>(BBP)      | C <sub>19</sub> H <sub>20</sub> O <sub>4</sub> | 312.37                         | 1.12              | 97.0          |   |
| Di(2-ethylhexyl)<br>phthalate<br>(DEHP) | C <sub>24</sub> H <sub>38</sub> O <sub>4</sub> | 390.56                         | 0.99              | 98.0          |  |

**Table S2.** The operating conditions of gas chromatograph/mass spectrometer (GC/MS)

| <b>GC (7820A, Agilent) MS (5977E, Agilent)</b> |                                                                                                                                              |
|------------------------------------------------|----------------------------------------------------------------------------------------------------------------------------------------------|
| <b>Column</b>                                  | HP-5 <sup>®</sup> (30 m x 0.25 mm x 0.25 µm,<br>(5%-Phenyl)-methylpolysiloxane, Agilent)                                                     |
| <b>Oven temperature program</b>                | 60°C → 20°C/min → 280°C (5 min)                                                                                                              |
| <b>Injector temperature</b>                    | 230°C                                                                                                                                        |
| <b>Injector mode</b>                           | splitless                                                                                                                                    |
| <b>Carrier gas</b>                             | He (99.999%), 1 mL/min                                                                                                                       |
| <b>Mass Detector</b>                           | Mass transfer line: 280°C, Ionization voltage: 70 eV<br>Ion source: 230°C, Quadruple: 150°C<br>Scan mode/ Selected Ion Monitoring (SIM) mode |

**Table S3.** Recovery of HS–INME using MWCNTs–IL/PANI coating layer followed GC/MS

| Analytes                   | Sample 1                       |                            | Sample 2                       |                           | Reproducibility             |                                              |
|----------------------------|--------------------------------|----------------------------|--------------------------------|---------------------------|-----------------------------|----------------------------------------------|
|                            | Industrial use                 |                            | Food application               |                           | (± RSD%, n=5)               |                                              |
|                            | Detected concentration<br>(µg) | Recovery <sup>a</sup> (%)  | Detected concentration<br>(µg) | Recovery <sup>a</sup> (%) | Intra assay<br>(run to run) | Inter assay<br>(needle to needle, 5 needles) |
| Dimethyl phthalate         | < LOD                          | 107.59 ± 4.83 <sup>c</sup> | < LOD                          | 95.72 ± 4.51              | 10.23                       | 17.45                                        |
| Diethyl phthalate          | < LOD                          | 106.11 ± 8.36              | < LOD                          | 96.17 ± 5.20              | 10.06                       | 11.49                                        |
| Diallyl phthalate          | < LOD                          | 108.21 ± 6.81              | < LOD                          | 92.91 ± 14.90             | 5.30                        | 13.74                                        |
| Dibutyl phthalate          | 26.05 ± 3.12 <sup>b</sup>      | 61.13 ± 4.92               | 24.87 ± 1.65                   | 56.58 ± 5.49              | 7.70                        | 15.81                                        |
| Benzyl butyl phthalate     | < LOD                          | 69.77 ± 15.13              | < LOD                          | 56.57 ± 8.46              | 12.11                       | 17.22                                        |
| Di(2-ethylhexyl) phthalate | < LOD                          | 68.91 ± 17.85              | < LOD                          | 57.48 ± 17.13             | 11.92                       | 20.00                                        |

<sup>a</sup> Recovery data for spiked with 2.00 × 10<sup>2</sup> µg phthalate<sup>b</sup> Mean value ± standard deviation (n = 3)<sup>c</sup> Recovery ± RSD (%) (n = 3)

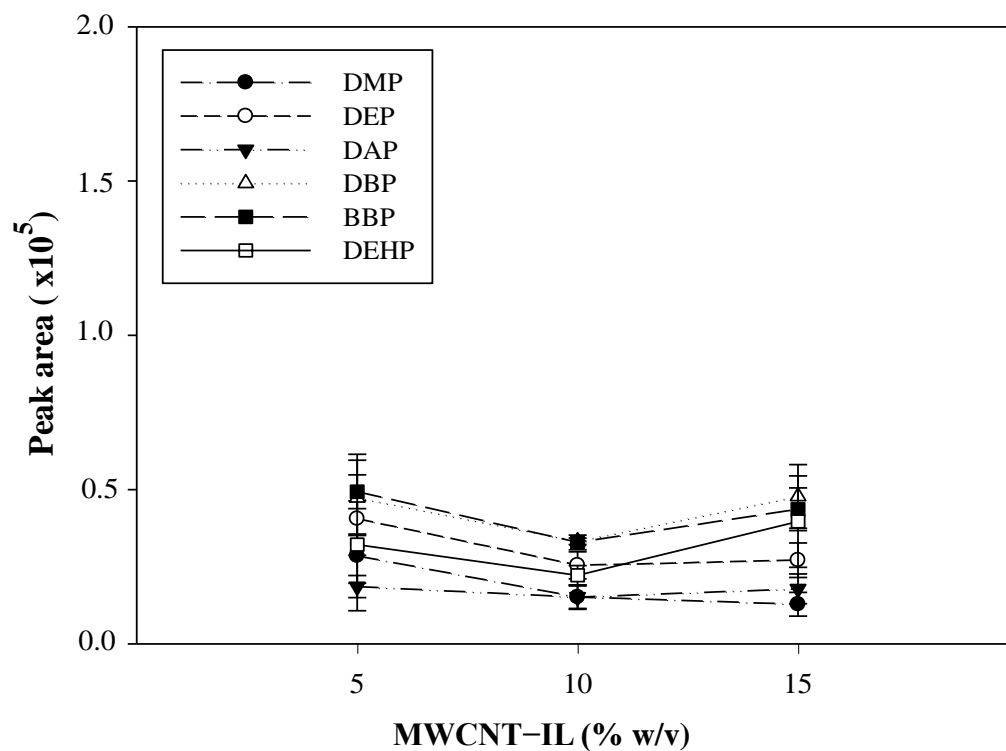

**Figure S1.** Influence of percentage of MWCNTs and ionic liquid (% w/v) on the peak area of target analytes. The standard deviation (n=3) is represented by a bar. HS-INME-MWCNT-IL/PANI conditions: polymerization potential 2.0 V, polymerization time 500 s, coating layer length of 1 cm, saturation time 60 min, extraction at 50°C, adsorption time for 30 min, and desorption at 230°C for 3 min.

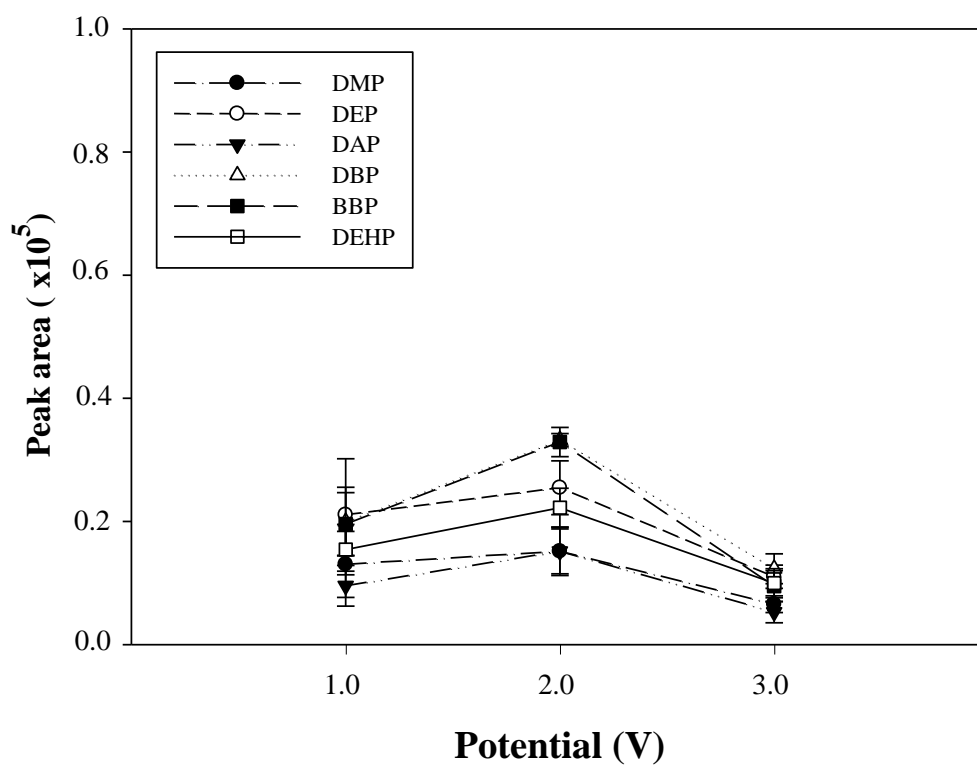

**Figure S2.** Influence of applied polymerization potential on the peak area of target analytes. The standard deviation ( $n=3$ ) is represented by a bar. HS-INME-MWCNT-IL/PANI conditions: 10% MWCNTs-IL (% w/v), polymerization time 500 s, coating layer length of 1 cm, saturation time 60 min, extraction at 50°C, adsorption time for 30 min, and desorption at 230°C for 3 min.

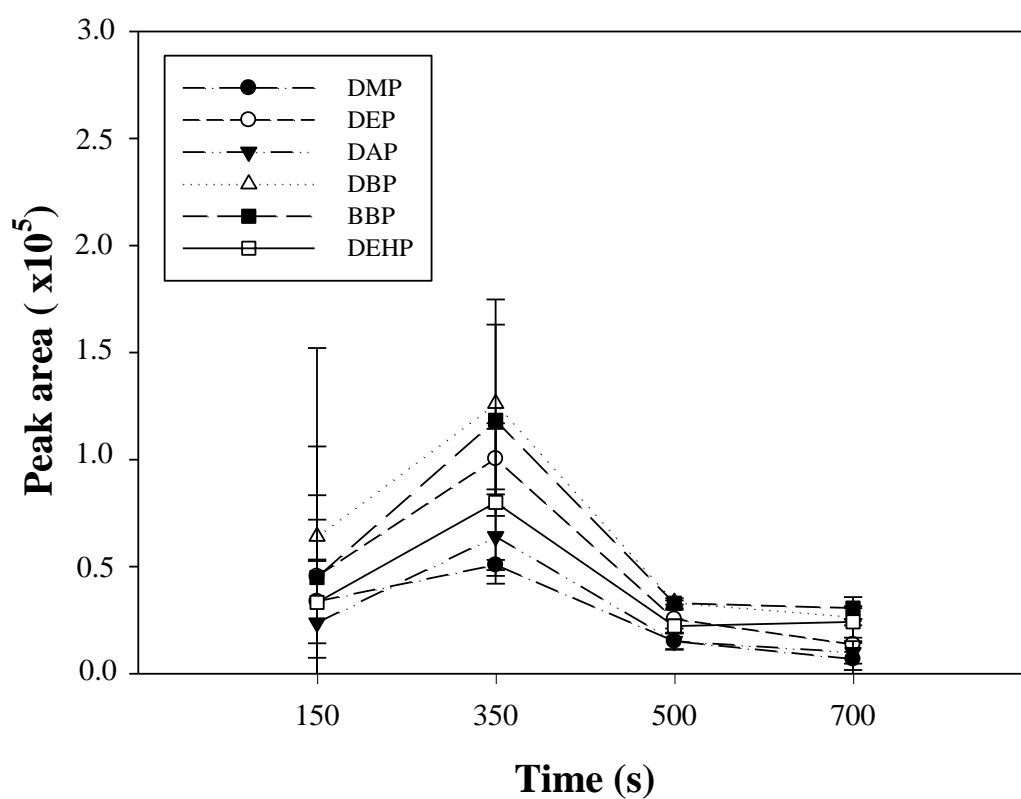

**Figure S3.** Influence of electrochemical deposition time on the peak area of target analytes. The standard deviation ( $n=3$ ) is represented by a bar. HS-INME-MWCNT-IL/PANI conditions: 10% MWCNT-IL (% w/v), polymerization potential 2.0 V, coating length of 1 cm, saturation time 60 min, extraction at 50°C, adsorption time for 30 min, and desorption at 230°C for 3 min.

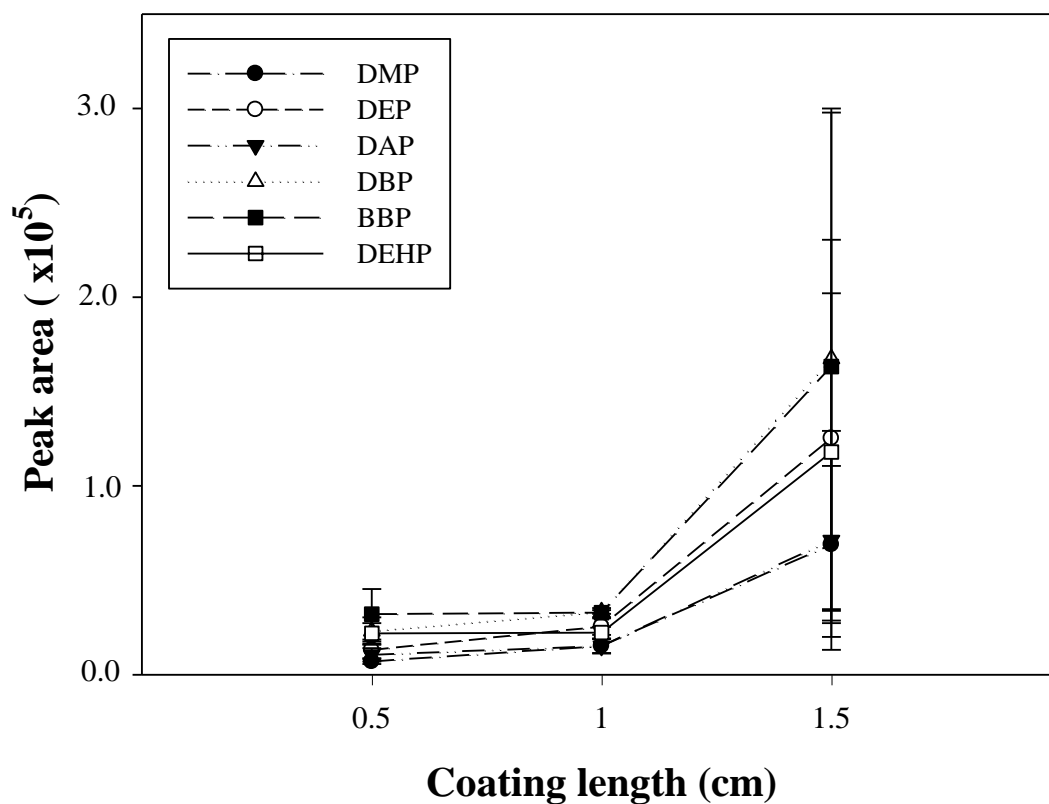

**Figure S4.** Influence of adsorbent surface length on the peak area of target analytes. The standard deviation (n=3) is represented by a bar. HS-INME-MWCNT-IL/PANI conditions: 10% MWCNT-IL (% w/v), polymerization potential 2.0 V, polymerization time 500 s, saturation time 60 min, extraction at 50°C, adsorption time for 30 min, and desorption at 230°C for 3 min.



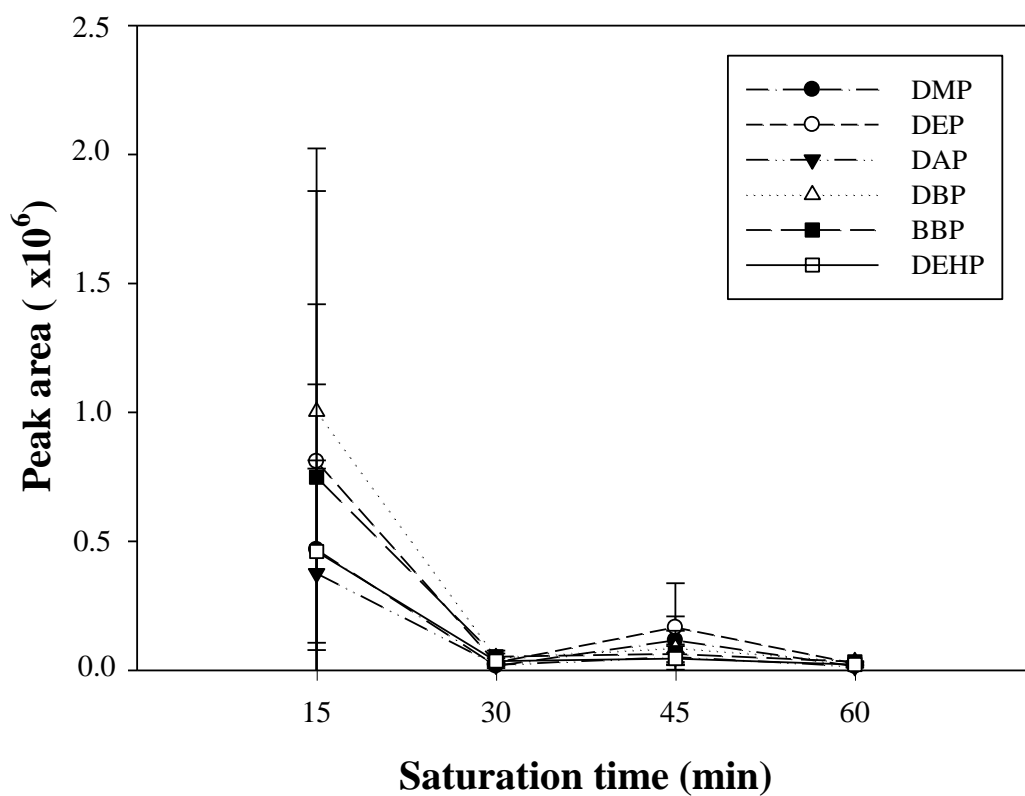

**Figure S5.** Influence of saturation time on the peak area of target analytes. The standard deviation ( $n=3$ ) is represented by a bar. HS-INME-MWCNT-IL/PANI conditions: 10% MWCNT-IL (% w/v), polymerization potential 2.0 V, polymerization time 500 s, coating layer length of 1 cm, extraction at 50°C, adsorption time for 30 min, and desorption at 230°C for 3 min.

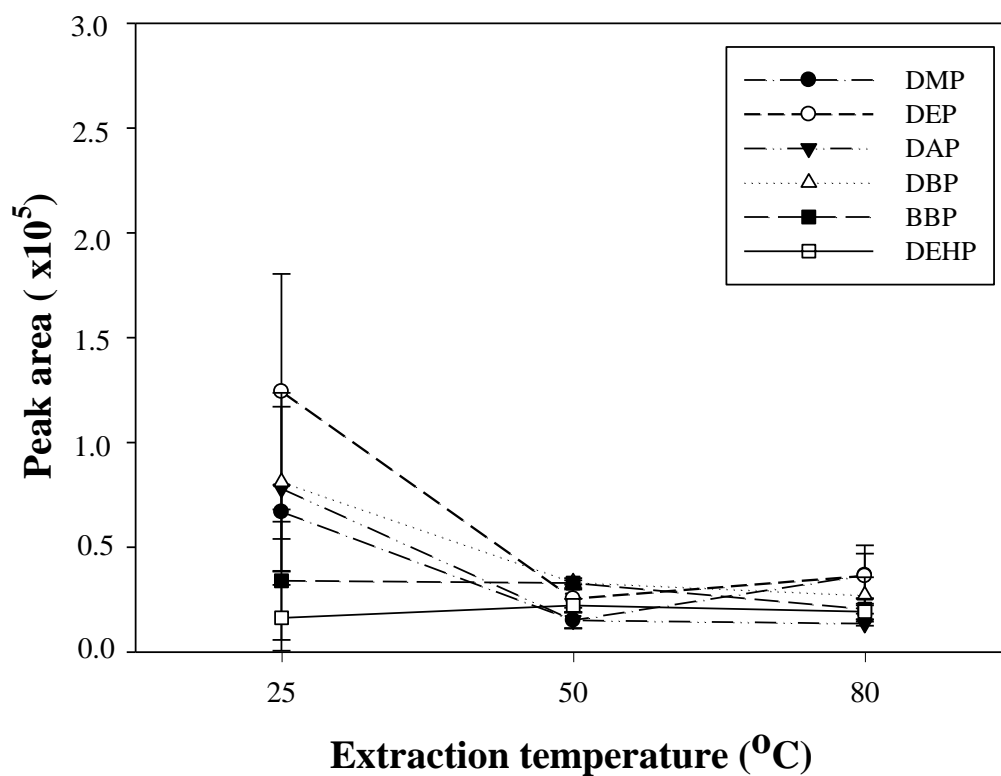

**Figure S6.** Influence of applied extraction temperature on the peak area of target analytes. The standard deviation (n=3) is represented by a bar. HS-INME-MWCNT-IL/PANI conditions: 10% MWCNT-IL (% w/v), polymerization potential 2.0 V, polymerization time 500 s, coating layer length of 1 cm, saturation time 60 min, adsorption time for 30 min, and desorption at 230°C for 3 min.

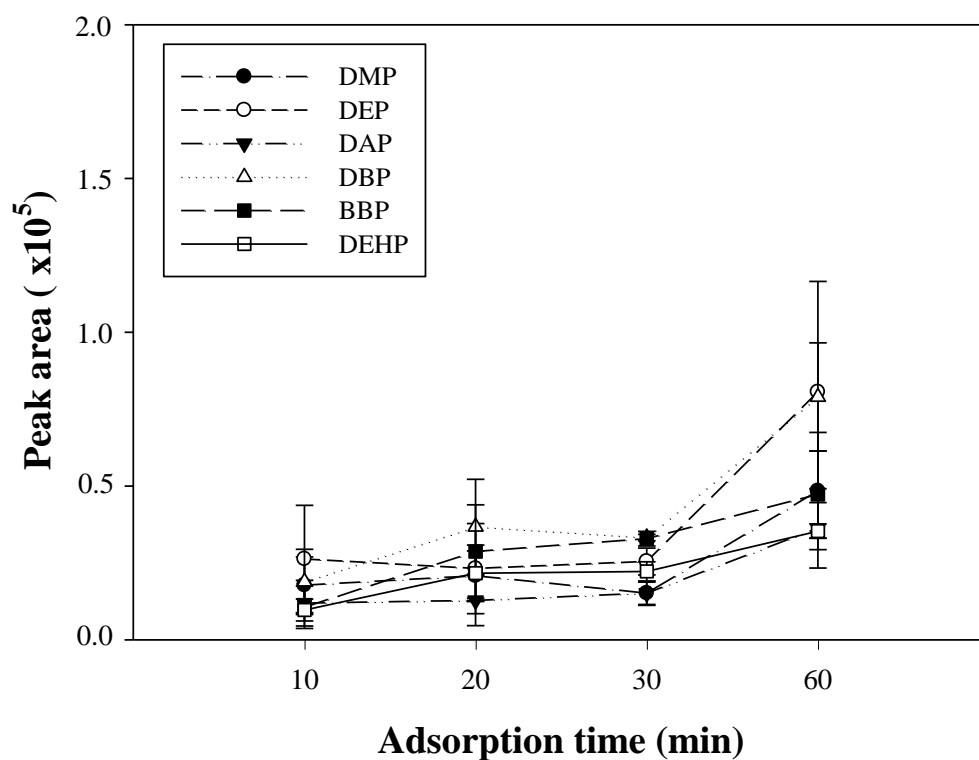

**Figure S7.** Influence of adsorption time on the peak area of target analytes. The standard deviation ( $n=3$ ) is represented by a bar. HS-INME-MWCNT-IL/PANI conditions: 10% MWCNT-IL (% w/v), polymerization potential 2.0 V, polymerization time 500 s, coating layer length of 1 cm, saturation time 60 min, extraction at 50°C, and desorption at 230°C for 3 min.

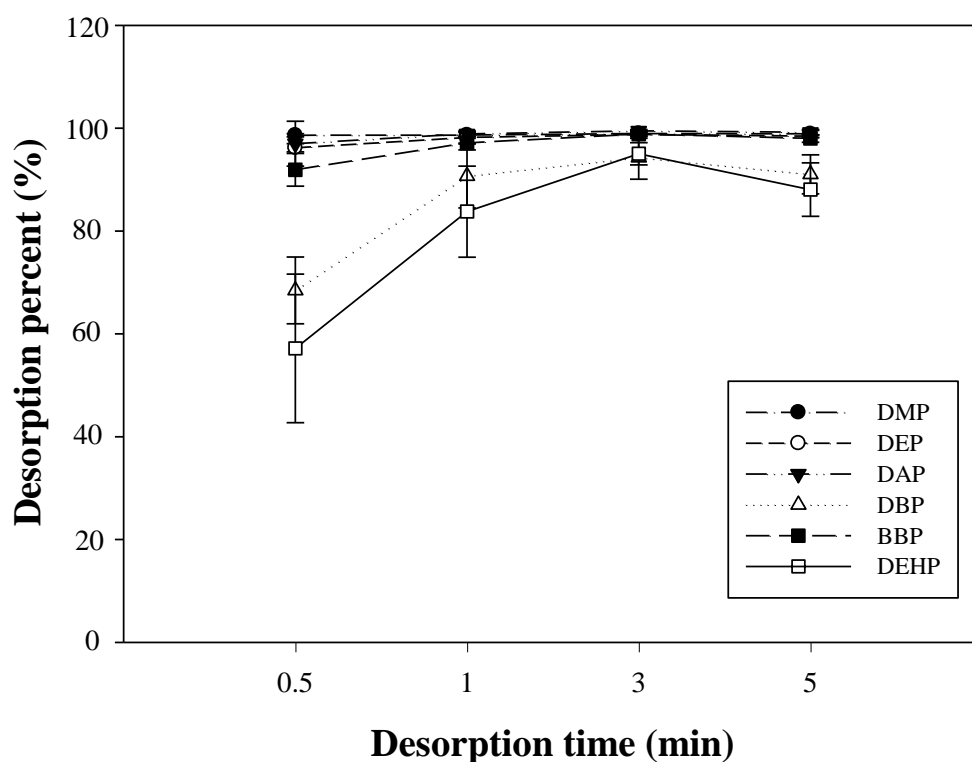

**Figure S8.** Influence of applied desorption time on the peak area of target analytes. The standard deviation ( $n=3$ ) is represented by a bar. HS-INME-MWCNT-IL/PANI conditions: 10% MWCNT-IL (% w/v), polymerization potential 2.0 V, polymerization time 500 s, coating layer length of 1 cm, saturation time 60 min, extraction at 50°C, adsorption time for 30 min, and desorption at 230°C.

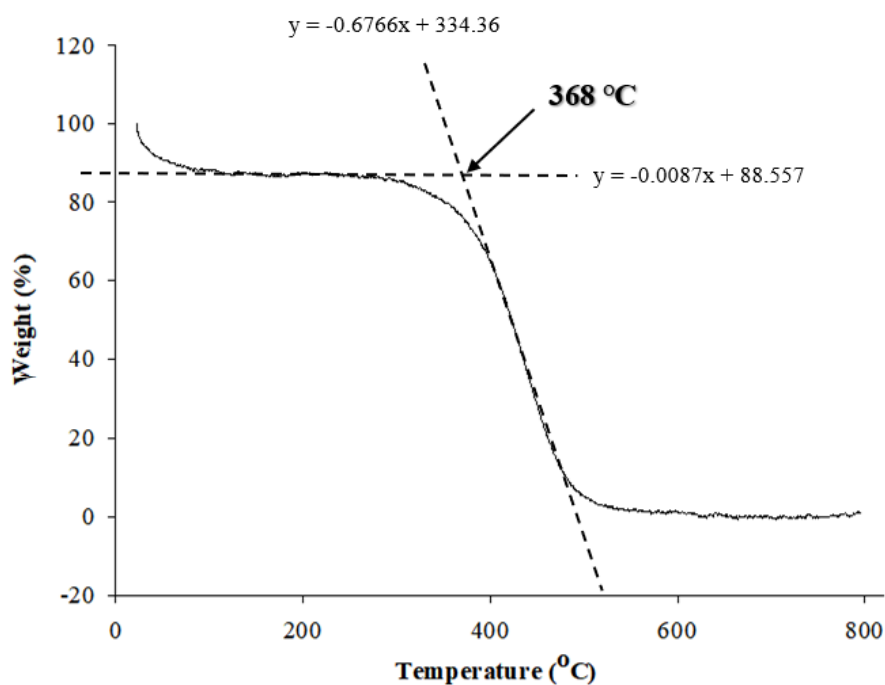

**Figure S9.** Thermogravimetric analysis curve of MWCNT–IL/PANI adsorbent.

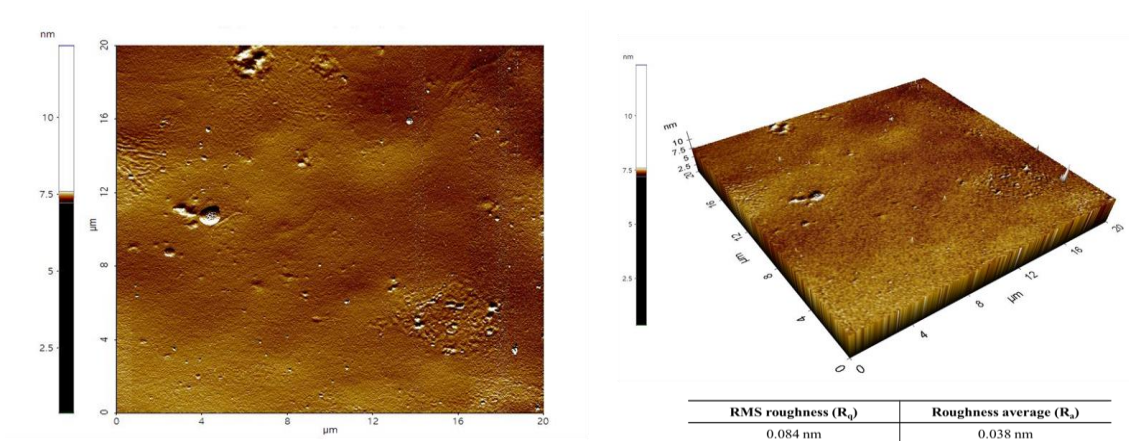

**Figure S10.** AFM images of MWCNT-IL/PANI deposited on the surface of stainless steel wire.

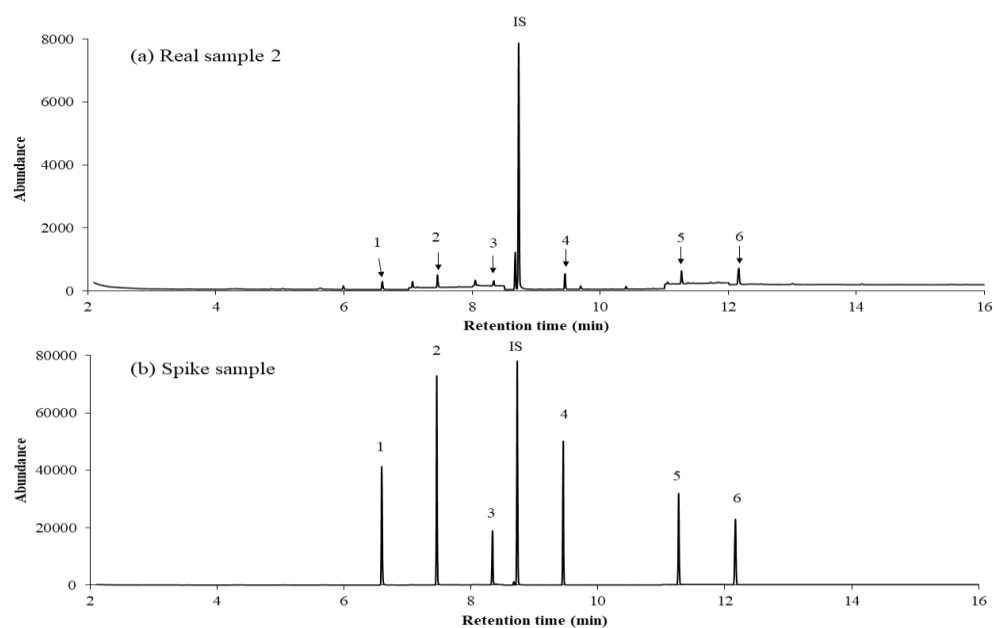

**Figure S11.** Chromatogram obtained from (a) sample 2, and (b) spiked sample 2 by HS-INME-MWCNT-IL/PANI. Peak 1, dimethyl phthalate; 2, diethyl phthalate; 3, diallyl phthalate; 4, dibutyl phthalate; 5, benzyl butyl phthalate; 6, di(2-ethylhexyl) phthalate; and IS, anthracene
